# Supplementary material
Source: publisher figshare collection journal article supplement (https://gsajournals.figshare.com/ndownloader/files/13669703)
Supplement: Supplementary file 1 [file 13669703]

**Table S3 List of oligos for mutant sequencing**

| **Target** | **Figure** | **Sequence** | **Oligo name** | **Function** |
| --- | --- | --- | --- | --- |
| *atf-2* | 10AB | GACGTATTTGTCCTTACATCAAATAGGTTGACAGC | BF-1323 | PCR, sequencing |
|  | 10AB | GGAGATCCTTCTGAAAAGTTCGACGAATCC | BF-1324 | PCR |
|  |  |  |  |  |
| *Ce-ben-1* | 8A | CCTGGCTAGTTCAAACGAAGAGAAGGACGGAGCTCC | BF-2043 | PCR, sequencing |
|  | 8A | CGAGACCGGGCACCGTATTTATTGCGCAACACTCG | BF-2044 | PCR |
|  |  |  |  |  |
| *Cbr-ben-1* | 8B | GCTCGCTTTCTTTCCAAAAACGAGCAGAAGCCCCAATCGGTCG | BF-2041 | PCR, sequencing |
|  | 8B | CGTGCGCAGCTTGTGATTCATGCTCCGCCCACTTTTCCG | BF-2042 | PCR |
|  |  |  |  |  |
| Chr I | 2AB, S5A | CGAGATGTCGACCGCTAGTGTAGCTTACAGATGG | BF-2015 | PCR |
|  | 2AB, S5A | CACACTATTTGCAATGAATCTCACTCTGATGAGCG | BF-2016 | PCR |
|  | 2AB, S5A | AAGTATTATGTCAAGTATTGGTTTTAGAGCTACAGTACACTCTG | BF-2017 | sequencing |
|  |  |  |  |  |
| *lir-2* | 1, 2AB, 9A, S5C | GAGAGCACACACAAATGCGTTCCCAACAGAAGGTGTTCTCCGTGTC | BF-2060 | PCR |
|  | 1, 2AB, 9A, S5C | CACTTCTTTCAAGAACCAAGGTGATAATGTAGTTGC | BF-2061 | PCR |
|  | 1, 2AB, 9A, S5C | GAGTTTAGTGGTGTCACAGTATCCCATCTCGG | BF-1493 | sequencing |
|  |  |  |  |  |
| *lir-2* | 4B | CGAATGCTCTTTATAGAGGATGCGCTTCAGAGGGTTGCC | BF-1769 | PCR (3' of PAM) |
|  | 4B | GGAATATTGCACTTGGCGCTAATTCAAACCAAACTTACATCTCG | BF-1770 | PCR (3' of PAM) |
|  | 4B | GCATTTTCAGATCAGTGACAGTCATGTTGGCAGC | BF-1771 | PCR (5' of PAM) |
|  | 4B | GAAACTCTAATTTCACGCAATGTTTCGGCGATTGTGAGCG | BF-1772 | PCR (5' of PAM) |
|  |  |  |  |  |
| *sex-1* | 1, 2AB, 3, 4A (left), 7, 10C-E,  11, 12, S5B | CCTCCTCTCGTTGTGGAAATGTTCCAACTCTCAAC | BF-1804 | PCR, sequencing |
|  | 1, 2AB, 3, 4A (left), 7, 10C-E,  11, 12, S5B | CGTGAATAAACCAGAACCGTCTGGTTGTGATACTTATGAC | BF-1805 | PCR |
|  |  |  |  |  |
| *sex-1* | 4A (right) | CCTCCTCTCGTTGTGGAAATGTTCCAACTCTCAAC | BF-1804 | PCR, sequencing |
|  | 4A (right) | TGTGACAAGTTGCTTGTTCGAGGTAAAAGTCAGTTCAATCGAGATCG | BF-1492 | PCR |
|  |  |  |  |  |
| *sex-1* | 8A (right) | GGAGCTCGATTGGACTGGACCTACAGAGG | BF-1441 | PCR |
|  | 8A (right) | AAATGACATGCCGCATTGACGGATGCG | BF-1442 | PCR, sequencing |
|  |  |  |  |  |
| *hum-4* | 6 | GTGTTCGCTTTCAGTTATGATGTCCATCAAGTAATTGTCG | BF-2365 | PCR, sequencing |
|  | 6 | GAAGGTACGCAAACGGCTAAGTTAAAGGTGACCAAGG | BF-2366 | PCR |
|  | 6 | GAGTTCGATTCTTCGACGATGAAGTTCCATTCTCTAGCGAGC | BF-2367 | PCR |
|  | 6 | CACCCTTGGTCACCTTTAACTTAGCCGTTTGCGTACC | BF-2368 | PCR, sequencing |
|  |  |  |  |  |
| *hum-4* | S4 | GCCATCGTCAGCCTACATTGAGAGATGAAGTG | BF-2365 | PCR, sequencing |
|  | S4 | GAACTTCTAGAGCATTCAGCAAGACCTTGCGACCTC | BF-2366 | PCR |
|  | S4 | GCATGCTCCTCTAGACTCGAAAACATGGGCATGG | BF-2461 | PCR, sequencing |
|  | S4 | CTCAACTTACCATGGAACGGTCTCTGCCATTCGTCG | BF-2475 | PCR |
| *hum-4* insert | S4 | CTCTAGTAATTCTCAACTGTACATATTCGATCG | BF-2474 | PCR |
| *Cbr-rpb-1* | 8B (right) | CTTTATCCGTATTTCGCCGTTT | Cbr-ama1-97F | PCR |
|  | 8B (right) | TCCTGCTCGAATTCCCTAAC | Cbr-ama1+258R | PCR, sequencing |
|  |  |  |  |  |
| *coh-4* | 9B | CGAGGTCACTCTGGATTCGA | AFS615 | PCR, sequencing |
|  | 9B | AATTGAACATGAGAGTCAGGA | AFS616 | PCR |
|  |  |  |  |  |
| *dpy-10* | 9B | CGAACGTTCTCGCTGACAACGAACTATTCGCGTCAG | BF-1853 | PCR, sequencing |
|  | 9B | GCATGTTTGATTTGGAGTAGTTCCTGGCATTCC | BF-1854 | PCR |
|  |  |  |  |  |
| *zen-4* | 9, S3 | TAGATGGATCTGTTCGTATG | AFS572 | PCR, sequencing |
|  | 9, S3 | CTTGAGCAGAAACCTCGAAG | AFS573 | PCR |
